# Supplementary material
Source: publisher figshare collection journal article supplement (https://frontiersin.figshare.com/ndownloader/files/21301587)
Supplement: Supplementary file 1 [file 21301587]

**Supplementary material 2.** Spacer 1 nucleotide variability within species (first diagonal, bold values with standard deviation); average evolutionary divergence between species (values in lower diagonal and standard) and number of fixed diferences between species (values in upper diagonal and standard).

|  | Talb | Tauri | Tgue | Tnem | Tpan | Trot | Tsig | Ttrif |
| --- | --- | --- | --- | --- | --- | --- | --- | --- |
| Talb | **0,009 ± 0,001** | 76 | 10 | 19 | 11 | 14 | 17 | 07 |
| Tauri | 0,162 ± 0,030 | **0,011 ± 0,001** | 74 | 71 | 69 | 72 | 76 | 63 |
| Tgue | 0,040 ± 0,007 | 0,171 ± 0,032 | **0,026 ± 0,002** | 19 | 13 | 13 | 21 | 09 |
| Tnem | 0,046 ± 0,007 | 0,147 ± 0,027 | 0,059 ± 0,010 | **0,009 ± 0,002** | 10 | 12 | 11 | 05 |
| Tpan | 0,046 ± 0,010 | 0,159 ± 0,039 | 0,061 ± 0,013 | 0,049 ± 0,010 | **0,022 ± 0,005** | 0 | 12 | 0 |
| Trot | 0,051 ± 0,009 | 0,164 ± 0,032 | 0,064 ± 0,011 | 0,055 ± 0,009 | 0,023 ± 0,007 | **0,020 ± 0,005** | 15 | 0 |
| Tsig | 0,041 ± 0,007 | 0,154 ± 0,032 | 0,058 ± 0,010 | 0,028 ± 0,005 | 0,050 ± 0,012 | 0,056 ± 0,010 | **0,006 ± 0,001** | 1 |
| Ttrif | 0,041 ± 0,007 | 0,152 ± 0,028 | 0,057 ± 0,009 | 0,032 ± 0,007 | 0,041 ± 0,010 | 0,045 ± 0,010 | 0,019 ± 0,008 | **0,025 ± 0,008** |
